# Supplementary material
Source: publisher site journal article supplement (https://www.dovepress.com/get_supplementary_file.php?f=388934.docx)
Supplement: Supplementary file 1 [file get_supplementary_file.php]

**Supplementary Table 1: Basic information of 7 datasets in the meta-analysis**

| Study | GEO accession | Tissue type | Sample size | | Country | Author | Platforms | Gene chip |
| --- | --- | --- | --- | --- | --- | --- | --- | --- |
| OA | Controls |
| 1 | GSE1919 | Synovium | 5 | 5 | Germany | Ungethuem U | GPL91 | Affymetrix Human Genome U95A Array |
| 2 | GSE32317 | Synovium | 19 | 7 | USA | Wang Q | GPL570 | Affymetrix Human Genome U133 Plus 2.0 Array |
| 3 | GSE41038 | Synovium | 3 | 4 | Australia | Thomas GP | GPL6883 | Illumina HumanRef-8 v3.0 expression beadchip |
| 4 | GSE46750 | Synovium | 12 | 12 | Belgium | Lambert C | GPL10558 | Illumina HumanHT-12 V4.0 expression beadchip |
| 5 | GSE48556 | PBMCs | 106 | 33 | Netherlands | Ramos YF | GPL6947 | Illumina HumanHT-12 V3.0 expression beadchip |
| 6 | GSE55235 | Synovium | 10 | 10 | Germany | Woetzel D | GPL96 | Affymetrix Human Genome U133A Array |
| 7 | GSE55457 | Synovium | 10 | 10 | Cermany | Woetzel D | GPL96 | Affymetrix Human Genome U133A Array |
